# Supplementary material for: Human Lung Cancer (A549) Cell Line Cytotoxicity and Anti-Leishmania major Activity of Carissa macrocarpa Leaves: A Study Supported by UPLC-ESI-MS/MS Metabolites Profiling and Molecular Docking
Source: Pharmaceuticals (Basel). 2022 Dec 14;15(12):1561. doi: 10.3390/ph15121561 (PMC9784246; doi:10.3390/ph15121561)
Supplement: Supplementary file 1 [file pharmaceuticals-15-01561-s001.zip › pharmaceuticals-2031560-supplementary.pdf]

## SUPPLEMENTARY MATERIAL

# Human Lung Cancer (A549) Cell Line Cytotoxicity and Anti-*Leishmania major* Activity of *Carissa macrocarpa* Leaves: A Study Supported by UPLC-ESI-MS/MS Metabolites Profiling and Molecular Docking

Mohamed A. A. Orabi <sup>1,\*</sup>, Omaish Salman Alqahtani <sup>1</sup>, Bandar A. Alyami <sup>2</sup>, Ahmed Abdullah Al Awadh <sup>3</sup>, El-Shaymaa Abdel-Sattar <sup>4</sup>, Katsuyoshi Matsunami <sup>5</sup>, Dalia I. Hamdan <sup>6</sup> and Mohamed E. Aboulela <sup>7</sup>

<sup>1</sup> Department of Pharmacognosy, College of Pharmacy, Najran University 1988, Najran 66454, Saudi Arabia

<sup>2</sup> Department of Pharmaceutical Chemistry, College of Pharmacy, Najran University 1988, Najran 66454, Saudi Arabia

<sup>3</sup> Department of Clinical Laboratory Sciences, Faculty of Applied Medical Sciences, Najran University, 1988, Najran 66454, Saudi Arabia

<sup>4</sup> Department of Microbiology and Immunology, Faculty of Pharmacy, South Valley University, Qena 83523, Egypt

<sup>5</sup> Department of Pharmacognosy, Graduate School of Biomedical and Health Sciences, Hiroshima University, 1-2-3 Kasumi, Minami-Ku, Hiroshima 734-8553, Japan

<sup>6</sup> Department of Pharmacognosy and Natural Products, Faculty of Pharmacy, Menoufia University, Shibin Elkom 32511, Egypt

<sup>7</sup> Department of Pharmacognosy, Faculty of Pharmacy, Al-Azhar University, Assiut-Branch, Assiut 71524, Egypt

\* Correspondence: maorabi@nu.edu.sa or mohamedorabi@azhar.edu.eg; Tel.: +966-557-398-835

### List of contents

| No        | Content                                                                                                                                                         | Page |
|-----------|-----------------------------------------------------------------------------------------------------------------------------------------------------------------|------|
|           | Identification of the different metabolites of <i>C. macrocarpa</i> .                                                                                           | S1-4 |
| Figure S1 | TIC of <i>Carissa macrocarpa</i> leaves total hydro-methanolic extract (T) and its ethyl acetate fraction (E) using UPLC-ESI-MS/MS in negative ionization mode. | S5   |
| Figure S2 | TIC of <i>Carissa macrocarpa</i> leaves butanol (B), and methanol (M) fractions, using UPLC-ESI-MS/MS in negative ionization mode.                              | S5   |
| Figure S3 | Structures of identified compounds and their isomers evaluated by molecular docking simulation.                                                                 | S6   |
| Figure S4 | Continue structures of identified compounds and their isomers evaluated by molecular docking simulation.                                                        | S7   |
| Figure S5 | Continue structures of identified compounds and their isomers evaluated by molecular docking simulation.                                                        | S8   |
| Figure S6 | Dose-response curves of total extract and fractions of <i>C. macrocarpa</i> against A549 cell line.                                                             | S9   |
| Figure S7 | Dose-response curves of EtOAc and butanol fractions of <i>C. macrocarpa</i> against <i>L. major</i> promastigote.                                               | S9   |

## Identification of the different metabolites of *C. macrocarpa*

### *Phenolic acids/derivatives*

Compounds **6**, **7**, **9**, **39**, **64**, and **74** that showed a molecular ion at  $m/z$  353  $[M-H]^-$  were detected at retention times 1.87, 2.03, 2.16, 15.06, and 16.52, respectively. Compounds **6** and **9** produced  $MS^2$  fragments at  $m/z$  191 [quinic acid- $H$ ] $^-$ ,  $m/z$  179 [caffeic acid- $H$ ] $^-$ ,  $m/z$  161 [caffeic acid- $H_2O-H$ ] $^-$ , hence, assigned as 3-*O*-caffeoylquinic acid and 5-*O*-caffeoylquinic acid, respectively. Where 4-*O*-caffeoylquinic acid (**7**) showed characteristic  $MS^2$  fragments at  $m/z$  191, 173  $[191-H_2O]$  and 161 [1]. Another caffeoylquinic acid derivative, diacetox-5-methoxyphenylacroyl-*O*-*p*-coumaroyl-*O*-caffeoylquinic acid (**39**) was identified with the aid of MS,  $MS^2$  data (Table 3, main manuscript), and reported literature [2].

Additionally, 4-*O*-caffeoyl shikimic and 3-*O*-caffeoyl shikimic acids have been proposed for **64** and **74** depending upon  $MS^2$  fragments  $m/z$  179 [caffeic acid- $H$ ] $^-$ ,  $m/z$  161 [caffeic acid- $H_2O-H$ ] $^-$ , the comparison with the published data [3]. Other hydroxycinnamate derivatives such as 5-*O*-*p*-coumaroylshikimic and 4-*O*-*p*-coumaroylshikimic acids have been suggested for compounds **12** and **15**.  $MS^2$  fragmentation exhibited a base peak at  $m/z$  163 due to  $[p$ -coumaric acid- $H_2O]$ , as well as other characteristic fragments [2]. Moreover, compound **29**, which was detected at retention time 6.58 showed a deprotonated molecular ion at  $m/z$  515 and distinctive fragments at  $m/z$  353  $[M-162]^-$  and 179 that are matched with the reported literature of dicaffeoylquinic acid (**29**). Feruloyl-*O*-sinapoylquinic acid (**37**) was designated for peak detected at  $m/z$  573  $[M-H]^-$ , based on  $MS^2$  fragments  $m/z$  397  $[M$ -ferulic acid- $H]$  $^-$ , 223  $[sinapic\ acid-H]$  $^-$ , 173  $[quinic\ acid-H_2O-H]$  $^-$  as compared with the literature [3]. Besides, compounds, dimethoxycinnamoyl-*O*-caffeoylquinic acid (**54**) and its isomer (**70**) were observed at different retention times 13.30 and 15.66 but exhibited similar deprotonated molecular ions at  $m/z$  543  $[M-H]^-$  and characteristic fragment ions at  $m/z$  353  $[M$ -dimethoxycinnamoyl- $H_2O]$  $^-$  and 173 that attributed to dimethoxycinnamoyl moiety. The compounds **59**, **60**, and **63** were detected at  $m/z$  599 and generated  $MS^2$  ions at  $m/z$  397 and 223, hence assigned as 3-*O*-caffeoyl-4-*O*-sinapoylquinic acid (**59**) and its isomers 3-*O*-Sinapoyl-4-*O*-caffeoylquinic acid (**60**) and 1-*O*-caffeoyl-3-*O*-sinapoylquinic acid (**63**) upon comparison with the published data [3]. In addition, two dimethoxycinnamoylquinic acids isomers were suggested for compound **75** ( $m/z$  383  $[M-H]^+$ ) and compound **78** ( $m/z$  381  $[M-H]^-$ ) [3]. The hydroxycinnamate glycosides **8**, **13**, **76**, **93**, and **94**, were detected in the current study at retention times 2.13, 2.87, 16.59, 22.78, and 22.90, respectively. Where, compounds **8** and **76** were suggested to be coumaric acid hexoside, due to their similar molecular ions at  $m/z$  325  $[M-H]^-$  which generated fragment ions at  $m/z$  187, 163, and 145 in accordance with the literature [4]. Also, caffeic acid hexoside was assigned for compound **13** depending upon its molecular ion at  $m/z$  343  $[M+H]^+$  with distinctive fragments at  $m/z$  326, 311, and 285, which agree with the reported data [5]. The protonated molecular ions of caffeoyl cyclohexanediol hexoside (**93**)  $m/z$  441  $[M+H]^+$  and *p*-coumaroyl cyclohexanediol hexoside (**94**)  $m/z$  443  $[M+H]^+$  produced fragmentation patterns perfectly matching the published data [6]. Compound **77** with  $m/z$  337  $[M-H]^-$  was characterized as *p*-coumaroylquinic acid, based on comparing its fragmentation patterns ( $m/z$  202, 190, and 163) with that in the literature [1]. Finally, compound **83** was identified as caffeoyl-2-hydroxyethane-1,1,2-tricarboxylic acid according to a comparison (Table 3, main manuscript) with the reported data [2]. Quinic acid (**2**) and galloylquinic acid (**44**), gallic acid monohydrate (**31**), hydroxycinnamic acid derivatives [ferulic acid (**32**), caffeic acid (**34**), and syringic acid (**35**)], together with hydroxybenzoic acid (**30**) and ascorbic acid (**47**), were detected at different retention times as shown in (Table 3, main manuscript).

### *Flavonoids/derivatives*

Flavonoids are one of the major polyphenolics detected in the polar butanol and MeOH fractions. Compounds **18** and **19** provided the same deprotonated molecular ion at  $m/z$  755  $[M-H]^-$  with different MS<sup>2</sup> fragments; 593  $[M-162 \text{ (hexoside)}]^-$  and 285  $[M-308 \text{ (rutinoside)}]^-$  for kaempferol-7-*O*-hexoside-3-*O*-rutinoside (**18**) [1]. Quercetin-7-*O*-deoxyhexoside-3-*O*-deoxyhexosyl-hexoside (**19**) generated fragment ions at  $m/z$  609  $[M-146 \text{ (deoxyhexosyl unit)}]^-$  and  $m/z$  301  $[M-146-308 \text{ (deoxyhexosyl and rutinoside units)}]^-$  [1]. Other kaempferol derivatives were kaempferol-*O*-deoxyhexoside-*O*-deoxyhexosyl-hexoside isomers, which were designated for compounds **21** and **22**, respectively. Both compounds provided the same molecular ions  $m/z$  739  $[M-H]^-$  and MS<sup>2</sup> fragmentation patterns  $m/z$  593 and 285 [1]. The compounds **23** and **24** were tentatively identified as quercetin-*O*-deoxyhexosyl-hexoside isomers based on their molecular ion at  $m/z$  609  $[M-H]^-$  and MS<sup>2</sup> fragment at  $m/z$  301 due to loss of rutinoside unit ( $-308$  amu). Also, the other isomer exhibited fragment ion at  $m/z$  465 in positive ionization mode due to loss of deoxyhexosyl unit ( $-146$  amu) [1].

The compounds **98–100** are belonging to quercetin derivatives and have been identified as rhamnosyl hexosyl-methyl-quercetin, quercetin-3-*O*-galactoside, and quercetin-3-*O*-glucoside, respectively as depicted from their MS, MS<sup>2</sup> data and comparison with literature [7]. Compound **98** showed a molecular ion at 613  $[M+H]^+$  and MS<sup>2</sup> fragments at  $m/z$  595, 521, 491, 449, 327, and 287. While compounds **99** and **100** provided the same molecular ion at  $m/z$  465  $[M+H]^+$  and MS<sup>2</sup> fragments at  $m/z$  301, 300, 257, 255, 229, 179, and 151.

Kaempferol derivatives were detected upon characterization of MS and MS<sup>2</sup> of compounds **79**, **88**, and **89** that are assigned as kaempferol galloylglucoside, kaempferol deoxyhexosyl-hexoside (**88**), and kaempferol-3-rutinoside (**89**), respectively. Kaempferol galloylglucoside (**79**) displayed molecular ion at  $m/z$  601  $[M+H]^+$  and MS<sup>2</sup> fragments at  $m/z$  447, 313, 285, 284, 169, 151, and 125 [8]. The two other compounds (**88** and **89**) exhibited the same molecular ion at  $m/z$  593  $[M-H]^-$ , MS<sup>2</sup> fragment at  $m/z$  285 [1].

The compounds **26** and **58** are belonging to flavonoid glycosides [2] that were tentatively identified as myricetin pentoside [9] and vitexin [10] based on their molecular ions at  $m/z$  449  $[M-H]^-$  and 431  $[M-H]^-$ , respectively. Myricetin pentoside showed characteristic MS<sup>2</sup> fragment at 317  $[M-132]^-$ , while 341  $[M-90]^-$  and 311  $[M-120]^-$  were the main fragment ions of mono-C-8-hexosylated flavones such as vitexin [10].

Finally, flavonoid aglycones such as quercetin (**27**) [2], tetramethoxyflavone (**42**), eriodictyol (**48**) [11], myricetin (**95**), and methyl dihydroquercetin (**97**) [12] have been proposed for peaks **27**, **42**, **48**, **95**, and **97**, respectively.

#### *Flavan-3-ols/derivatives*

*C. macrocarpa* is an important source of flavan-3-ol bioactive metabolites responsible for many pharmacological actions of the plant [1,12]. From these interesting molecules, compound **17** has been identified as (epi) catechin based on a molecular ion at  $m/z$  289  $[M-H]^-$ , MS<sup>2</sup> fragmentation  $m/z$  245, 205, 203, 187, 179, and 161, and the comparison with the literature [1]. Furthermore, the compounds **10**, **11**, **25**, and **53** are belonging to (epi)catechin derivatives of B-type; thus, (epi)catechin dimer was assigned for compounds **10**, **25**, and **53** based on deprotonated molecular ion at  $m/z$  577  $[M-H]^-$ , MS<sup>2</sup> fragmentation  $m/z$  425, 289 and comparison with the literature [1]. However, compound **11** showed pseudo-molecular ion at  $m/z$  865  $[M-H]^-$ , and fragmentation patterns at  $m/z$  451, 425, 407, and 289 were tentatively identified as (epi)catechin trimer [1]. Compounds **14**, **16**, and **20** provided the same deprotonated molecular ion at  $m/z$  451  $[M-H]^-$  and different MS<sup>2</sup> fragments at  $m/z$  408, 393, 351, 337, 301, 273, and 245 for compound **14** that was suggested to be catechin-3-*O*-glucoside. However, epicatechin 3-*O*-glucoside and its isomer were designated for compounds **16** and **20** with MS<sup>2</sup> fragments at  $m/z$  391, 343, 301, 287, 273, and 247 [13]. The compounds **28** and **33** were detected at the same molecular ion at  $m/z$  593  $[M-H]^-$  and showed MS<sup>2</sup> fragments at  $m/z$  557, 467, 441, 425, 407, and 289, hence proposed to be (epi)gallocatechin-(epi)catechin [9].

Also, compounds **45** and **49** that were detected at retention times 11.40 and 12.78, respectively, have been identified as (epi)gallocatechin (**45**) [9] and Epigallocatechin-3-*O*-cinnamate (**49**) [14] depending upon MS and MS<sup>2</sup> fragments at  $m/z$  305 [M-H]<sup>-</sup>, 261, 219, 221, 179, 165, and 125 (**45**) and  $m/z$  437 [M+H]<sup>+</sup>,  $m/z$  307 and 181 (**49**), respectively. Additionally, three compounds (**50**, **56**, and **61**) which were detected at different retention times displayed the same [M-H]<sup>-</sup> at  $m/z$  471 and were suggested to be methyl-3-*O*-gallocatechin gallate (**50**) (MS<sup>2</sup>,  $m/z$  441, 407, 313, 303, 287, 269, 257, 243, and 161), methyl-3-*O*-epigallocatechin gallate (**56**) (MS<sup>2</sup>,  $m/z$  441, 407, 303, 288, 257, 243, 201, 169, and 161), and methyl-3-*O*-epigallocatechin gallate isomer (**61**) (MS<sup>2</sup>,  $m/z$  441, 407, 297, 269, 241, 213, 199, 168, and 161), respectively [13]. Compound **57** that detected at retention time 14.37 exhibited [M-H]<sup>-</sup> at  $m/z$  633 and MS<sup>2</sup> fragments at  $m/z$  481 and 305 due to the loss of galloyl (-152 amu) and glucuronide moieties (-176 amu), hence has been identified as (epi)gallocatechin-*O*-gallate-*O*-glucuronide (**57**). The compounds **65** and **71** that provided the same molecular ions  $m/z$  617 [M-H]<sup>-</sup> and MS<sup>2</sup> fragments at  $m/z$  (599 [M-H<sub>2</sub>O]<sup>-</sup>, 465 [M-152]<sup>-</sup>, 289 [M-152-176]<sup>-</sup>) were suggested to be (epi)catechin-*O*-gallate-*O*-glucuronide and its isomer upon comparison with the published data [15]. Furthermore, gallocatechin derivatives were tentatively assigned for compounds **69** and **72** based on the protonated molecular ion at  $m/z$  455, and MS<sup>2</sup> fragments  $m/z$  307, 179, and 137 as reported [16]. Dimethyl (epi)catechin was designated for peak **87** that displayed deprotonated molecular ion at  $m/z$  317 and MS<sup>2</sup> fragment ions at 299, 289, 273, and 245 [16].

#### *Fatty acids/derivatives*

Compound **5** was proposed to be 3'-(4"-methoxyphenyl)-3'-oxo-propionyl hexadecanoate as previously reported [10]. Several octadecanoic acid derivatives (**36**, **38**, **40**, **43**, **46**, **55**, **66**, **90**, and **91**) were detected mainly in the ethyl acetate fraction of *C. macrocarpa* at different retention times and different molecular ions with characteristic MS<sup>2</sup> fragmentation, which may be due to loss of H<sub>2</sub>O, COOH, and H<sub>2</sub>O+COOH leading to [M-18]<sup>-</sup>, [M-45]<sup>-</sup>, and [M-63]<sup>-</sup>, respectively, and successive loss of CH<sub>2</sub> (-14 amu) [17]. In addition, linoleic (**86**) and palmitic acids (**92**) were identified based on their molecular ions, and fragmentation patterns (Table 3, main manuscript) referenced to published literature [18].

#### *Sterols and triterpenes/derivatives*

β-Sitosterol (**52**) and stigmasterol (**96**) were identified in the ethyl acetate soluble fraction by their molecular ions  $m/z$  411 [M-H]<sup>-</sup> and  $m/z$  413 [M+H]<sup>+</sup> [19,20]. Furthermore, the current study detected several triterpenoid aglycones at different retention times, such as compounds **62**, **80**, **81**, and **82**. Whereas, hydroxybetulinic acid (**62**) had molecular ion at  $m/z$  471 [M-H]<sup>-</sup> with characteristic MS<sup>2</sup> fragments at  $m/z$  453, 435, 407, and 389 [21]. Additionally, compounds **80**, **81**, and **82** provided the same molecular ion at  $m/z$  455 [M-H]<sup>-</sup>, MS<sup>2</sup> fragment ions ( $m/z$  439, 419, 411, 410, 407, and 397) and designated as ursolic acid, carissic acid, and oleanolic acid upon comparison with the literature [18,22]. Moreover, 3β-hydroxyolean-11-en-28,13β-olide (**51**) and methyl oleanolate (**67**) exhibited protonated molecular ions at  $m/z$  455 and 471, respectively [18,21]. Other pentacyclic triterpenoids that detected at retention time 15.46 (**68**) and 15.92 (**73**) are 3,27-dihydroxy-12-ursen-28-oic acids (3β-form), and 27-(4-Hydroxy-3-methoxycinnamoyl) (*E*-form), and its isomer, where they provided the same deprotonated molecular ion at  $m/z$  647 with MS<sup>2</sup> fragments at  $m/z$  485, 470, 455, and 440 [18].

#### *Miscellaneous*

Lignans such as carinol (**1**)  $m/z$  377 [M-H]<sup>-</sup> and MS<sup>2</sup> at 333, 271, 257, 163, and 119 and carissanol (**84**)  $m/z$  375 [M-H]<sup>-</sup> and MS<sup>2</sup> at  $m/z$  361, 347, 294, and 123 were assigned for (**1**) and (**84**) depending on a comparison

of their data with that previously reported [10]. Secoiridoid, which is also known as oleuropein aglycone (**41**), exhibited deprotonated molecular ion at  $m/z$  377 with MS<sup>2</sup> fragments at  $m/z$  345 [M-CH<sub>3</sub>OH]<sup>-</sup>, 327 [M-CH<sub>3</sub>OH-H<sub>2</sub>O]<sup>-</sup> [10]. Furthermore, sesquiterpenes such as dehydrocarissone which is known as 11-hydroxy-1,4-eudesmadien-3-one (**3**), cryptomeridiol (**4**), germacrenone (**85**) were identified based on MS, MS<sup>2</sup> and referenced to the published data [10,21]. Compound **101** with  $m/z$  621 [M-H]<sup>-</sup> and distinctive fragment ion at 501 was assigned as 2(R)-26-([(2E)-3-(4-hydroxy-3-methoxyphenyl)-1-oxo-2-propen-1-yloxy)-2,3-dihydroxypropylester [23]. Finally, compound **102** that detected at retention time at 31.25 gave a molecular ion at  $m/z$  429 [M-H]<sup>-</sup> and 431 [M+H]<sup>+</sup> with characteristic MS<sup>2</sup> fragments at  $m/z$  205, 191, 177, 149, 121, hence assigned as  $\alpha$ -tocopherol [24].

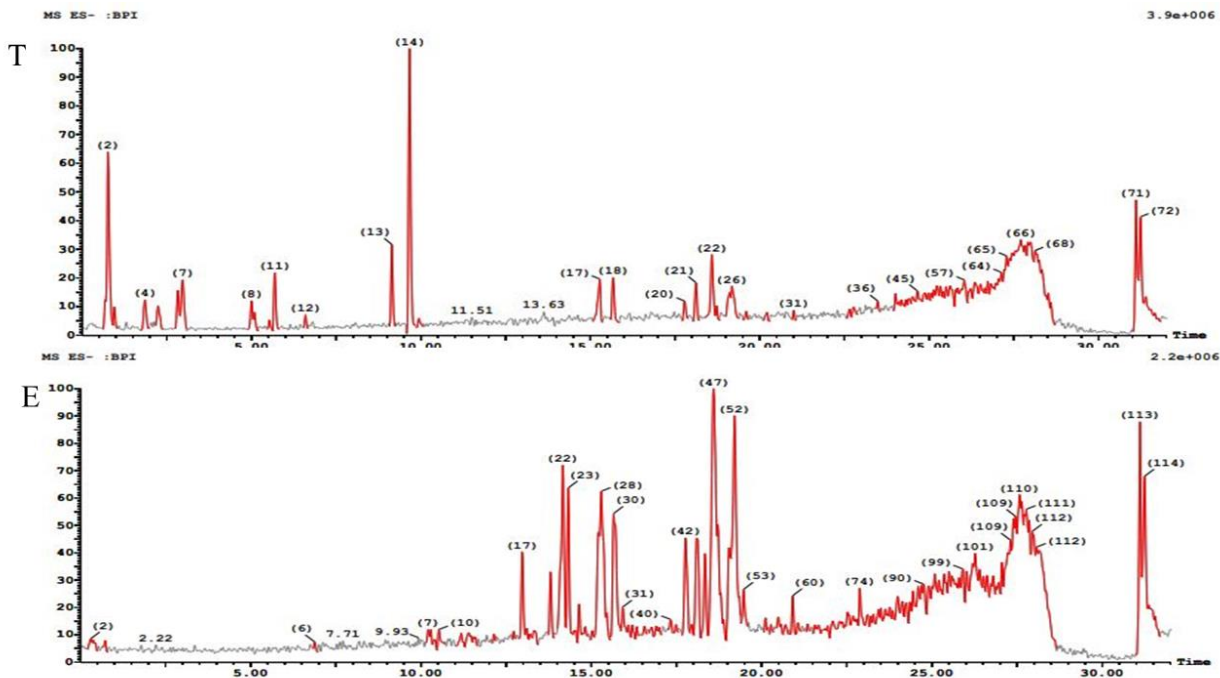

**Figure S1.** TIC of *Carissa macrocarpa* leaves total hydro-methanolic extract (T) and its ethyl acetate fraction (E) using UPLC-ESI-MS/MS in negative ionization mode.

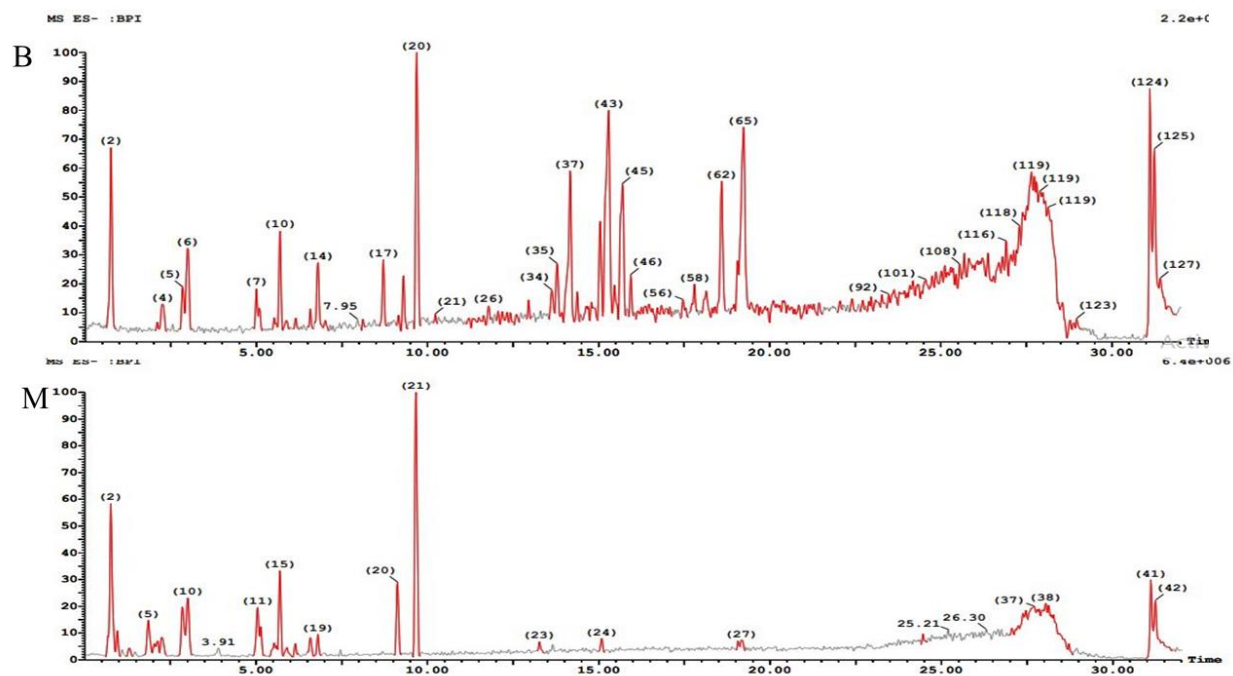

**Figure S2.** TIC of *Carissa macrocarpa* butanol (B), and methanol (M) fractions, using UPLC-ESI-MS/MS in negative ionization mode.

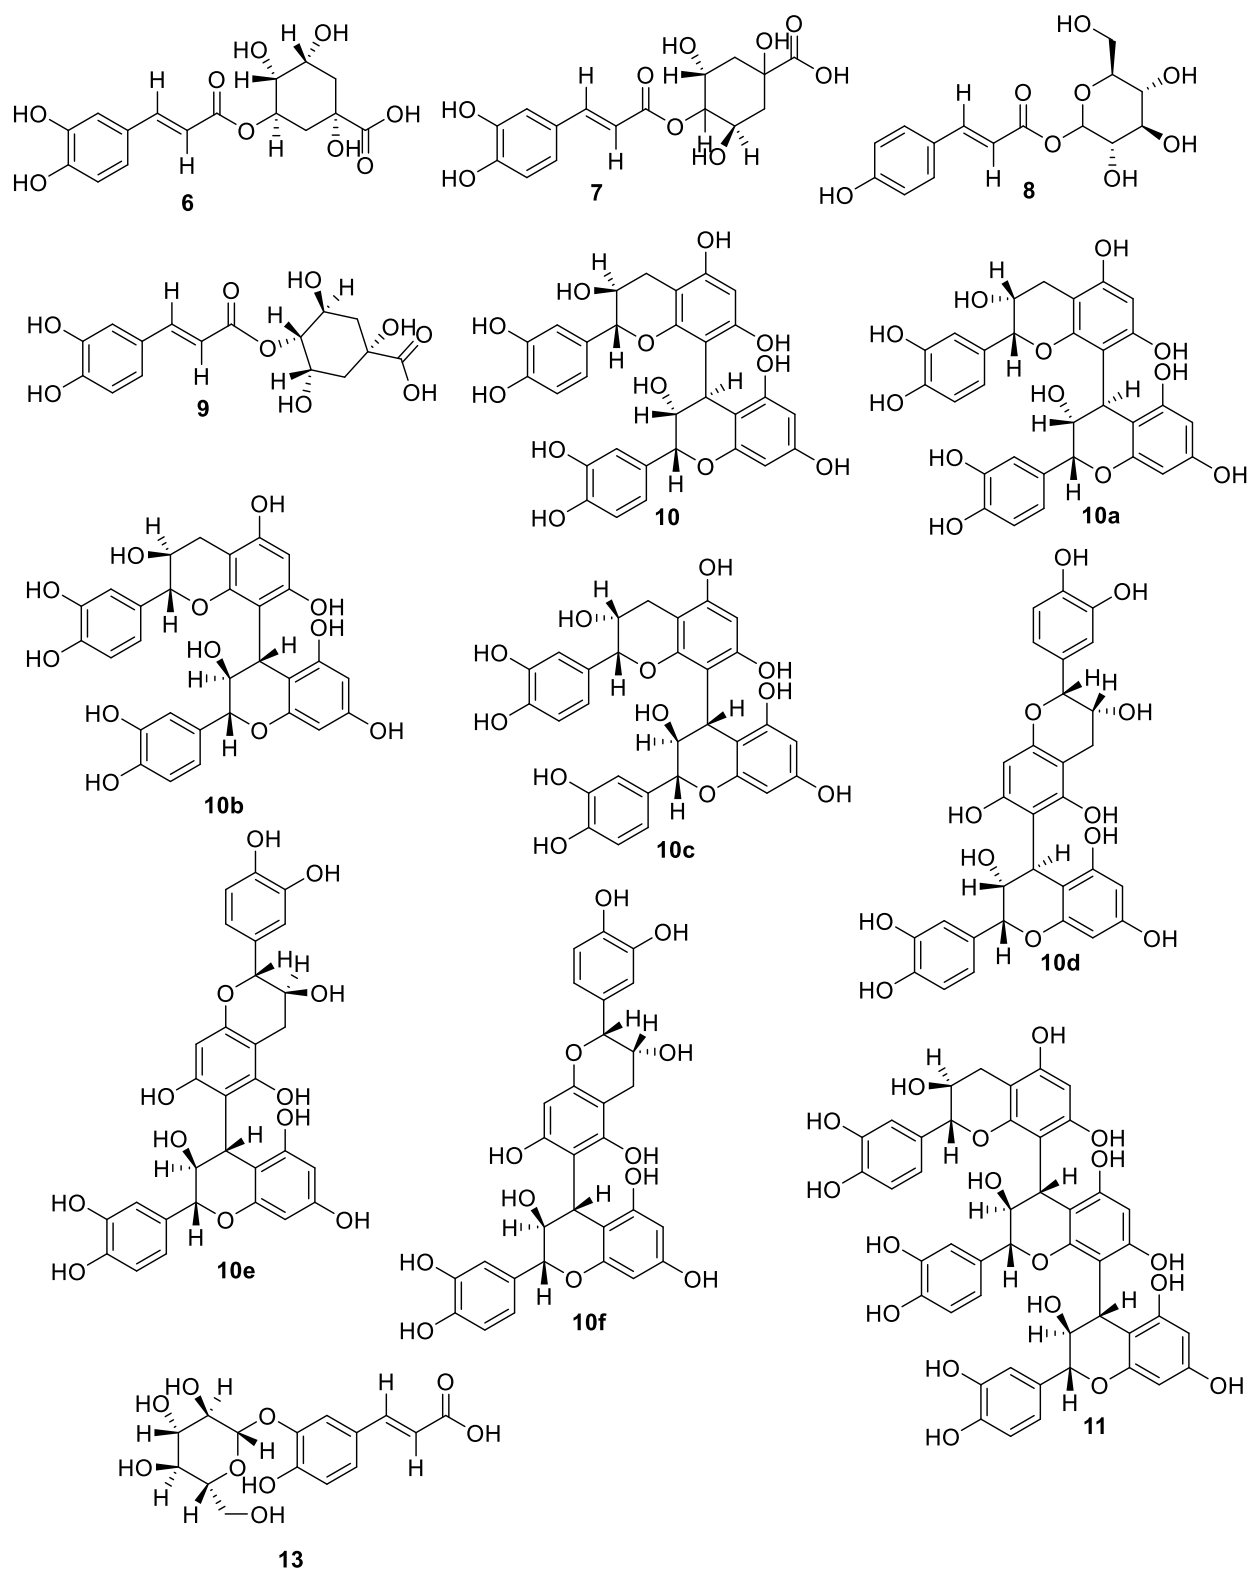

**Figure S3.** Structures of identified compounds and their isomers evaluated by molecular docking simulation.

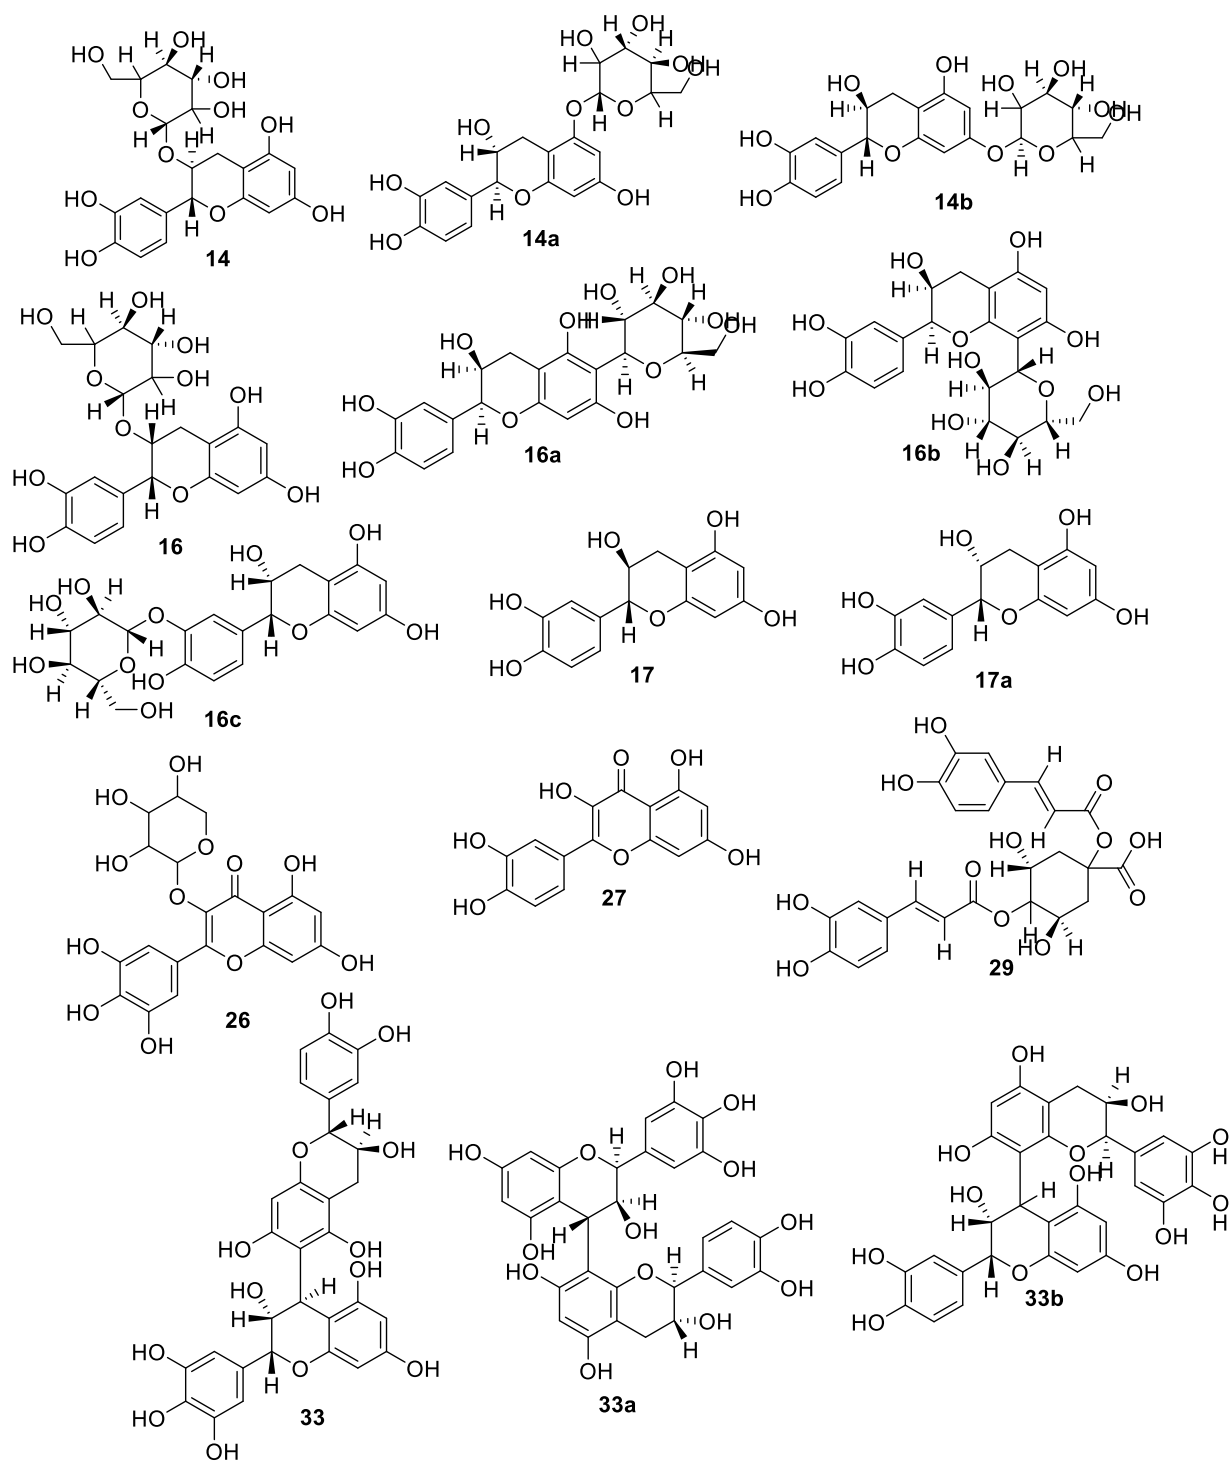

**Figure S4.** Continue structures of identified compounds and their isomers evaluated by molecular docking simulation.

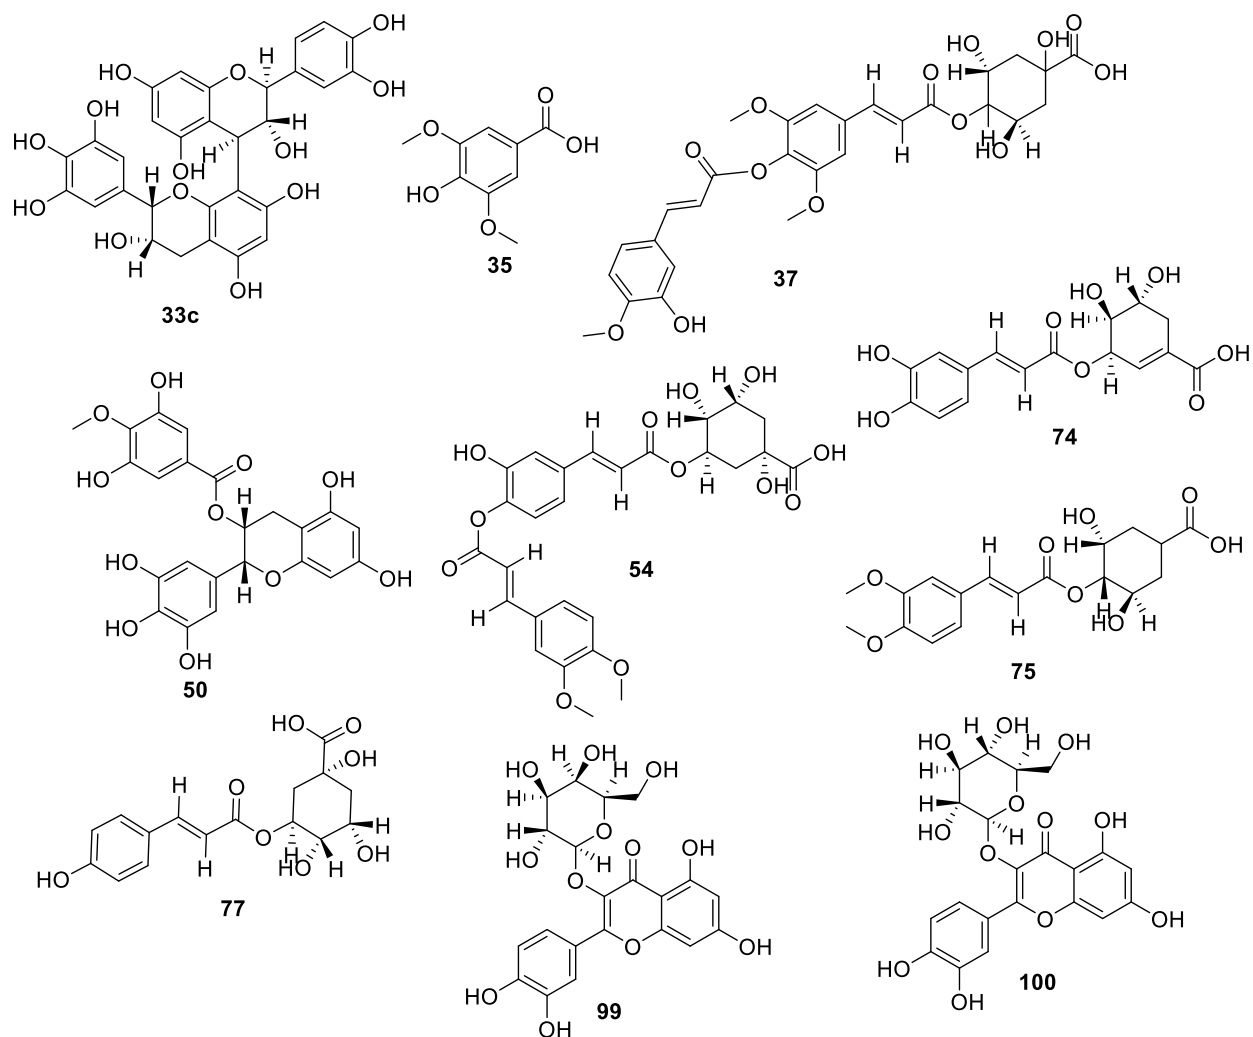

**Figure S5.** Continue structures of identified compounds and their isomers evaluated by molecular docking simulation.

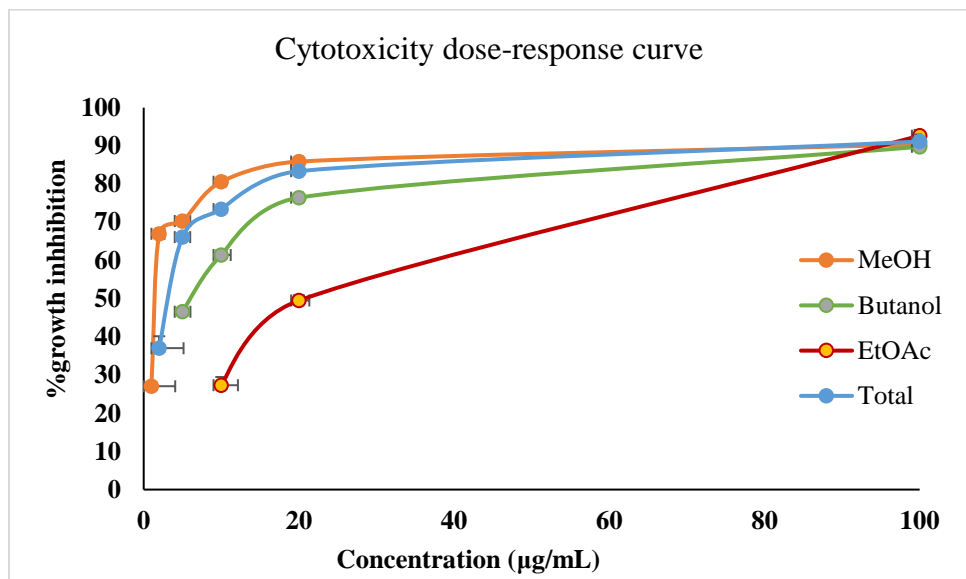

**Figure S6:** Dose-response curves of total extract and fractions of *C. macrocarpa* against A549 cell line.

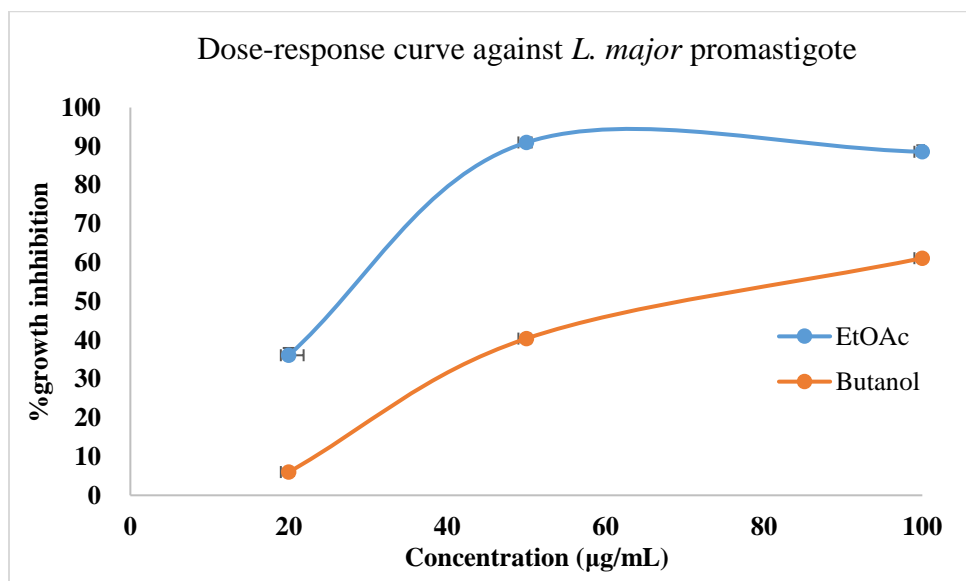

**Figure S7:** Dose-response curves of total extract and EtOAc and butanol fractions of *C. macrocarpa* against *L. major* promastigote.

## References

1. Souilem, F.; Dias, M.I.; Barros, L.; Calhella, R.C.; Alves, M.J.; Harzallah-Skhiri, F.; Ferreira, I.C. Phenolic Profile and Bioactive Properties of *Carissa macrocarpa* (Eckl.) A. DC.: An In Vitro Comparative Study between Leaves, Stems, and Flowers. *Molecules* **2019**, *24*, 1696.
2. Ben Said, R.; Hamed, A.I.; Mahalel, U.A.; Al-Ayed, A.S.; Kowalczyk, M.; Moldoch, J.; Oleszek, W.; Stochmal, A. Tentative characterization of polyphenolic compounds in the male flowers of *Phoenix dactylifera* by liquid chromatography coupled with mass spectrometry and DFT. *Int. J. Mol. Sci.* **2017**, *18*, 512.

3. Jaiswal, R.; Matei, M.F.; Subedi, P.; Kuhnert, N. Does roasted coffee contain chlorogenic acid lactones or/and cinnamoylshikimate esters? *Food Res. Int.* **2014**, *61*, 214-227.
4. Alakolanga, A.; Siriwardane, A.; Kumar, N.S.; Jayasinghe, L.; Jaiswal, R.; Kuhnert, N. LC-MSn identification and characterization of the phenolic compounds from the fruits of *Flacourtia indica* (Burm. F.) Merr. and *Flacourtia inermis* Roxb. *Food Res. Int.* **2014**, *62*, 388-396.
5. Pereira, E.; Pimenta, A.I.; Calhelha, R.C.; Antonio, A.L.; Verde, S.C.; Barros, L.; Santos-Buelga, C.; Ferreira, I.C. Effects of gamma irradiation on cytotoxicity and phenolic compounds of *Thymus vulgaris* L. and *Mentha x piperita* L. *LWT - Food Sci. Technol.* **2016**, *71*, 370-377.
6. Keefover-Ring, K.; Ahnlund, M.; Abreu, I.N.; Jansson, S.; Moritz, T.; Albrechtsen, B.R. No evidence of geographical structure of salicinoid chemotypes within *Populus tremula*. *PLoS One* **2014**, *9*, e107189.
7. Lin, L.-Z.; Chen, P.; Harnly, J.M. New phenolic components and chromatographic profiles of green and fermented teas. *J. Agric. Food Chem.* **2008**, *56*, 8130-8140.
8. Li, J.; Kuang, G.; Chen, X.; Zeng, R. Identification of chemical composition of leaves and flowers from *Paeonia rockii* by UHPLC-Q-Exactive Orbitrap HRMS. *Molecules* **2016**, *21*, 947.
9. Jaiswal, R.; Jayasinghe, L.; Kuhnert, N. Identification and characterization of proanthocyanidins of 16 members of the Rhododendron genus (Ericaceae) by tandem LC-MS. *J. Mass Spectrom.* **2012**, *47*, 502-515.
10. Patel, S. Food, pharmaceutical and industrial potential of *Carissa* genus: an overview. *Rev. Environ. Sci. Biotechnol.* **2013**, *12*, 201-208.
11. May A. El-Sayed, A.A.A.-G.; Hamdan, D.I.; El-Shazly, A.M. Phytoconstituents, LC-ESI-MS profile, antioxidant and antimicrobial activities of *Citrus x limon* L. Burm. f. cultivar variegated pink lemon. *J. Pharm. Sci. Res.* **2017**, *9*, 375-391.
12. Abu-Reidah, I.M.; Ali-Shtayeh, M.S.; Jamous, R.M.; Arráez-Román, D.; Segura-Carretero, A. HPLC-DAD-ESI-MS/MS screening of bioactive components from *Rhus coriaria* L. (Sumac) fruits. *Food Chem.* **2015**, *166*, 179-191.
13. Yuzuak, S.; Ballington, J.; Xie, D.-Y. HPLC-qTOF-MS/MS-based profiling of flavan-3-ols and dimeric proanthocyanidins in berries of two muscadine grape hybrids FLH 13-11 and FLH 17-66. *Metabolites* **2018**, *8*, 57.
14. Hussain, S.A.; Hameed, A.; Nazir, Y.; Naz, T.; Wu, Y.; Suleria, H.A.R.; Song, Y. Microencapsulation and Characterization of Natural Polyphenols from PHF Extract. *Nutrients* **2018**, *10*, 843.
15. Tala, V.R.S.; Candida da Silva, V.; Rodrigues, C.M.; Nkengfack, A.E.; Campaner dos Santos, L.; Vilegas, W. Characterization of proanthocyanidins from *Parkia biglobosa* (Jacq.) G. Don. (Fabaceae) by flow injection analysis—Electrospray ionization ion trap tandem mass spectrometry and liquid chromatography/electrospray ionization mass spectrometry. *Molecules* **2013**, *18*, 2803-2820.
16. Zhang, L.; Deng, W.-W.; Wan, X.-c. Advantage of LC-MS metabolomics to identify marker compounds in two types of Chinese dark tea after different post-fermentation processes. *Food Sci. Biotechnol.* **2014**, *23*, 355-360.
17. Yang, N.-Y.; Yang, Y.-F.; Li, K. Analysis of Hydroxy Fatty Acids from the Pollen of *Brassica campestris* L. var. *oleifera* DC. by UPLC-MS/MS. *J. pharmaceuticals* **2013**, *2013*.
18. Moodley, R.; Koorbanally, N.; Jonnalagadda, S.B. Elemental composition and fatty acid profile of the edible fruits of *Amatungula* (*Carissa macrocarpa*) and impact of soil quality on chemical characteristics. *Anal. Chim. Acta* **2012**, *730*, 33-41.
19. Petta, V.; Gkiozos, I.; Strimpakos, A.; Syrigos, K. Histones and lung cancer: Are the histone deacetylases a promising therapeutic target? *Cancer Chemother. Pharmacol.* **2013**, *72*, 935-952.
20. Zhou, Y.-X.; Xin, H.-L.; Rahman, K.; Wang, S.-J.; Peng, C.; Zhang, H. *Portulaca oleracea* L.: a review of phytochemistry and pharmacological effects. *Biomed Res. Int.* **2015**, *2015*.
21. Kaunda, J.S.; Zhang, Y.-J. The genus *Carissa*: An ethnopharmacological, phytochemical and pharmacological review. *Nat. prod. bioprospect.* **2017**, *7*, 181-199.
22. Jiao, Q.-S.; Xu, L.-L.; Zhang, J.-Y.; Wang, Z.-J.; Jiang, Y.-Y.; Liu, B. Rapid characterization and identification of non-diterpenoid constituents in *Tinospora sinensis* by HPLC-LTQ-orbitrap MSn. *Molecules* **2018**, *23*, 274.
23. Yu, J.-Q.; Xian, Y.-X.; Geng, Y.-L.; Wang, D.-J.; Zhou, H.-L.; Wang, X. Anti-liver cancer constituents from the thorns of *Gleditsia sinensis*. *Phytochem. Lett.* **2015**, *13*, 343-347.
24. Izhar, S.; Ahmed, D. *Carissa opaca*: A plant with great potential for future drugs for degenerative and infectious diseases. *ChemistrySelect* **2016**, *1*, 3005-3011.
